# Supplementary material
Source: publisher figshare collection journal article supplement (https://gsapubs.figshare.com/ndownloader/files/23201315)
Supplement: Supplementary file 1 [file 23201315]

## Sheet: TableS2
	TABLE S2: RESULTS FOR FOSSILIZED CENOZOIC BRACHIOPOD SPECIMENS
	Sample Name	Species	Stratigraphic Age	Upper Age Limit*	Lower Age Limit*		87Sr/86Sr	87Sr/86Sr 2σ		δ7Li		[Ca]		Mg/Ca	Sr/Ca	Mn/Sr		Al/Ca	Li/Ca		Locality	Formation	Exclusion Criteria
				(Mya)				(ppm)		(‰)		(mol/kg)		(mmol/mol)				(μmol/mol)
	LA1	Terebratalia transversa	Late Pleistocene	0.01	0.13		0.709156	20.978		25.7016		7.49426		5.19315	0.947087	49.8306		48.0213	28.3058		Newport Bay Mesa, Orange Co., CA	Palos Verdes Sand
	LA3	Laqueus sp.	Middle Pleistocene	0.13	0.78		0.70919	33.2229				6.88945		11.1439	0.991836	27.4629		182.195	25.5484		California	Lomita Marl	-
	LA10	Terabratalia transversa	Pleistocene	1.809	2.58		0.709093	23.1723		27.2205		7.01254		6.29073	1.08965	937.123		39.4037	35.0082		Nadu River, Graham Island, BC Canada	unknown	-
	LA12	Terebratalia sp.	Early Pleistocene	0.78	2.58		nd	nd		25.503		7.70572		6.73088	1.27335	29.4015		105.956	bdl§		Rincon Hill, Santa Barbara Co., CA	Santa Barbara Formation	-
	LA2	Terebratalia occidentalis	Early Pleistocene	1.9902	2.58		0.709085	38.153		28.6544		7.9123		6.96093	1.11229	17.374		16.4239	33.0696		Santa Barbara General Hospital, Santa Barbara Co., CA	Santa Barbara Formation	-
	LA2 dup	Terebratalia occidentalis	Early Pleistocene	2.007	2.58		0.709084	37.5009		27.0813		7.24194		6.57359	1.13944	14.4587		32.5319	33.0694		Santa Barbara General Hospital, Santa Barbara Co., CA	Santa Barbara Formation	-
	LA5	Terebratalia hemphilli	Early Pleistocene	0.78	0.78		0.70916	26.0536		28.2134		4.3845		5.6026	1.01896	23.9321		82.0472	30.8119		California	Santa Barbara	-
	LA5 dup	Terebratalia hemphilli	Early Pleistocene	0.78	0.78		0.709173	22.9963		26.584		7.3294		5.13576	1.03283	23.5267		140.001	31.9367		California	Santa Barbara	-
	LA6	Terebratalia sp.	Early Pleistocene	0.78	0.78		0.709176	17.3022		24.837		7.47733		7.5392	1.1606	32.1973		77.8894	bdl		Rincon Hill, Santa Barbara Co., CA	Santa Barbara Formation	-
	LA4	Laqueus vancouverensis	Late Pliocene	2.58	3.6		0.709125	1.3744		28.4043		7.67792		4.18522	1.0252	6.57829		17.1697	30.2384		Vista Entrada, Newport Bay, Orange Co., CA	Pico Formation	87Sr/86Sr
	LA4 dup	Laqueus vancouverensis	Late Pliocene	2.58	2.58		0.709078	16.0927		27.4745		6.34036		3.88822	1.02605	7.1347		20.9268	31.0525		Vista Entrada, Newport Bay, Orange Co., CA	Pico Formation	-
	LA7	Dallinella occidentalis	Late Pliocene	2.58	3.6		0.709084	38.7325		26.5818		6.95247		6.77219	1.25641	15.3409		302.731	31.4425		Fugler Point, Farey, Santa Barbara Co., CA	Careaga Formation	Al/Ca
	LA8	Dallinella occidentalis	Late Pliocene	2.58	3.6		0.70909	40.2171		28.2912		6.83035		7.04195	1.16586	41.6727		32.685	29.8492		Fugler Point, Farey, Santa Barbara Co., CA	Careaga Formation	-
	UF5	Thecidellina sp.	Pliocene	2.58	4.6		0.709062	16.6913		24.2694		15.2232		25.8093	0.694077	487.967		148.831	6.33075		Curacao	Seroe Domi Formation	Species
	LA9	Terebratalia arnoldi	Tortonian-Messinian, Late Miocene	7.00188	7.00188		0.708951	13.666		29.2725		7.35586		7.16384	0.862987	31.6104		136.249	29.7705		South Side Nacimiento River, San Luis Obispo Co., CA	Santa Margarita Formation	-
	UF1	Brachiopoda indet.	Late Miocene	6.7	8.05		0.708943	16.5459		26.645		7.09196		6.91029	1.02381	2619.77		62.5146	27.0883		Argentina, Chubut Province	Entrerriense Formation	Mn/Sr
	UF1 dup	Brachiopoda indet.	Late Miocene	6.85	9.6		0.708926	29.9533		28.0286		7.23112		6.82575	0.998735	3011.5		141.341	30.3499		Argentina, Chubut Province	Entrerriense Formation	Mn/Sr
	NZ2	Rhizothyris rhizoida	Otaian-Altonian	15.9	18.7		0.708448	40.157		24.5557		7.09971		7.84979	0.961231	104.425		245.394	28.3647		Fern Hill Quarry	Forest Hill Limestone	87Sr/86Sr
	NZ4	Pachymagas sp.	Otaian-Altonian	18.7	18.7		0.708492	20.2664		20.3464		2.02018		6.81303	1.11442	32.7888		85.6201	28.9241		Centre Bush Quarry	Forest Hill Limestone	-
	NZ4B	Pachymagas sp.	Otaian-Altonian	18.7	18.7		0.708482	13.2005		20.1831		9.8115		6.57457	1.13246	63.2189		230.513	31.1018		Centre Bush Quarry	Forest Hill Limestone	87Sr/86Sr
	NZ1	Notosaria antipoda	Otaian	18.7	21.7		0.708146	55.053		23.0239		6.80859		4.99043	0.958646	3.25518		5.81766	31.6883		Haughs Quarry	Mount Harris Formation	87Sr/86Sr
	NZ10	Waiparia elliptica	Otaian	18.7	18.7		0.708589	27.8264		22.8796		6.97441		9.59738	1.14588	101.096		257.075	43.4082		Blands Bluff	Curiosity Shop Sandstone	87Sr/86Sr
	NZ3	Waiparia elliptica	Otaian	19.06	19.8		0.708457	25.7386		23.4163		7.53854		6.37859	1.02075	95.8459		231.638	32.3098		Old Riffle butts	Gee Greensands	-
	NZ12	Pachymagas marshalli	Waitakian	21.93	22.6		0.708295	19.5199		25.5602		7.13869		6.24824	1.22041	15.8994		71.8298	42.8257		Trig Z	Otekaike Limestone	-
	UF3	Tichosina sp.	Late Oligocene	23.03	28.1		0.71158	36.0636				6.40825		20.6175	0.942823	243.555		580.324	6.67269		Antigua	Antigua Formation	87Sr/86Sr, Al/Ca
	NZ5	Terebratulina suessi	Duntroonian	25.2	27.3		0.709062	16.6913		23.2271		3.44185		7.94971	1.03901	369.06		210.519	35.3806		Broken River	Thomas Formation (the Fan Coral Bed)	87Sr/86Sr
	NZ7	Liothyrella concentrica	Duntroonian	27.3	27.3		0.708025	21.9153		20.7487		7.48567		11.5308	1.16449	636.25		1525.43	36.6614		Broken River	Thomas Formation (the Fan Coral Bed)	Al/Ca
	NZ11	Aetheia gaulteri	Early Whaingaroan	32.6	33.75		0.707863	30.2228		22.19		6.03477		5.64061	0.987326	60.2622		389.124	28.4462		McDonalds Quarry	Ototara Limestone	-
	NZ13	Stethothyris tapirina	Early Whaingaroan	27.3	28.8		0.708036	25.7937		20.468		7.37046		12.7973	1.08486	266.302		256.362	13.2075		Everetts Quary	Ototara Limestone	-
	NZ13B	Terebratulina suessi	Early Whaingaroan	29.9	31.1		0.707961	18.1542		23.4258		6.62124		11.9268	1.01225	277.82		154.767	12.1414		Everetts Quary	Ototara Limestone	-
	NZ6	Terebratulina suessi	Early Whaingaroan	32.97	33.6		0.707858	21.1169		23.3821		7.02316		9.09282	0.901604	62.2731		169.157	20.19		Everetts Quary	Ototara Limestone	-
	NZ6 dup	Liothyrella concentrica	Early Whaingaroan	27.3	34.6		nd	nd		21.9826		6.98746		8.25511	0.875458	56.5656		177.158	20.7351		Everetts Quary	Ototara Limestone	-
	NZ8	Liothyrella concentrica	Early Whaingaroan	27.3	34.6		0.709285	46.6741		22.3352		2.90323		8.63918	0.983137	32.6766		16.4613	36.4469		McDonalds Quarry	Ototara Limestone	87Sr/86Sr
	NZ14	Stethothyris uttleyi	Runangan	34.6	36.7		0.707817	20.198		20.6091		7.08878		4.74209	0.985767	19.7481		66.8255	34.1066		Weston Quarry	Ototara Limestone	-
	UF4	Terebratulina sp.	Late Eocene	33.9	37.8		0.707839	9.64281		17.6337		15.5473		7.85827	0.417608	481.202		198.592	2.81559		Florida, USA	Ocala Limestone
	NZ9	Liothyrella concentrica	Kaiatan	36.7	39.1		0.707907	40.2016		22.2972		7.12998		9.63399	0.989698	744.239		476.89	24.4522		Lorne Hill East	Waiareka Volcanic Formation	Al/Ca
	UF2	Plicatoria wilmingtonensis	Middle Eocene	37.8	47.8		nd	nd		19.8177		5.22134		25.729	1.02584	60.1931		817.905	9.06246		North Carolina, USA	Castle Hayne Formation	Al/Ca
	AU1	Bouchardia sp.	Eocene	35.15	56		0.707752	26.0536		21.6159		8.73096		4.44581	1.04421	160.761		242.99	5.64356		Antarctica	La Meseta Formation	-
	AU2	Bouchardia sp.	Eocene	33.9	56		0.707794	29.5473		20.6205		8.90729		9.88169	1.35356	239.326		156.754	41.2934		Antarctica	La Meseta Formation	-
	LA13	Brachiopoda indet.	Ypresian	47.8	53.8		0.707717	23.6419		23.0797		6.64556		9.2669	1.07721	245.998		275.619	69.4076		Arroyo Mezquital, Baja California Sur, MX	Bateque Formation	-
	LA11	Terebratula harlani	Paleocene	64.46	66		0.707846	12.1241		22.2448		7.67848		9.33959	0.964933	161.754		136.527	18.9579		New Jersey	Hornerstown Formation	-
	Note: Samples are stored at USC Department of Earth Sciences
	*Age ranges determined using marine 87Sr/86Sr curve (McArthur et al. 2012). For samples without 87Sr/86Sr data, ages are based on stratigraphic information
	†n.d. = Not Determined
	§ bdl = Below Detection Limit

## Sheet: G47558
Washington, K.E., et al., 2020, Lithium isotope composition of modern and fossilized Cenozoic brachiopods: Geology, v. 48, https://doi.org/10.1130/G47558.1
